# Supplementary material for: Myeloid maturation potentiates STAT3-mediated atypical IFN-γ signaling and upregulation of PD-1 ligands in AML and MDS
Source: PubMed Central journal article supplement (PMC6691003; doi:10.1038/s41598-019-48256-4), 2019-08-12
Supplement: 41598_2019_48256_MOESM1_ESM.pdf [file 41598_2019_48256_MOESM1_ESM.pdf]

**Myeloid maturation potentiates STAT3-mediated atypical IFN- $\gamma$  signaling and upregulation of PD-1 ligands in AML and MDS**

Digdem Yoyen-Ermis, Gurcan Tunali, Ece Tavukcuoglu, Utku Horzum<sup>1</sup>, Didem Ozkazanc, Tolga Sutlu, Yahya Buyukasik, and Gunes Esendagli

**Supplementary Information**

Supplementary Figures

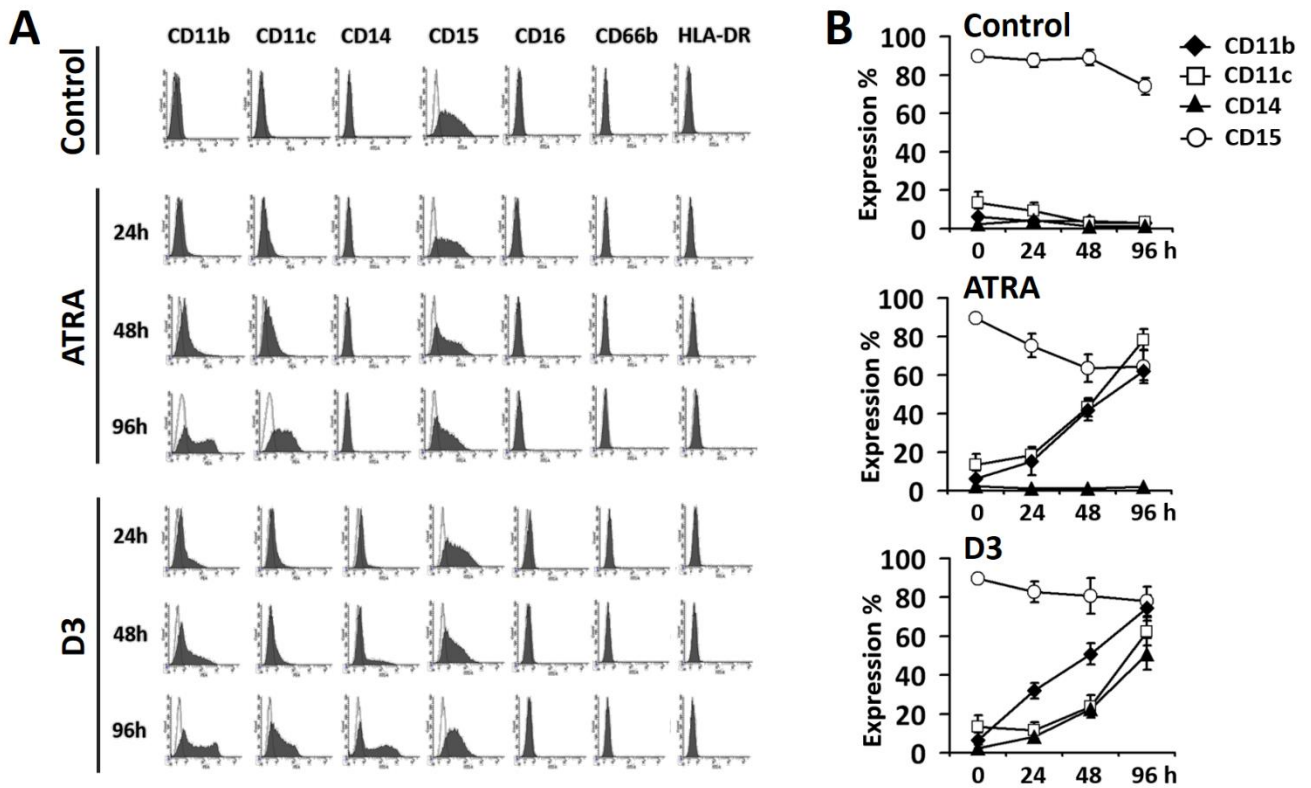

**Supplementary Figure 1. Expression of myeloid maturation markers upon ATRA or D3 treatment.** Results obtained with HL-60 cell line are shown. **A)** Representative flow cytometry histograms of the surface molecules associated with myeloid maturation (empty histogram, staining with isotype-matched control antibody; filled histogram, staining with specific antibody). **B)** The change in the percentage of cells positive for CD11b, CD11c, CD14, or CD15 in response to ATRA or D3 through 96h-long incubation period.

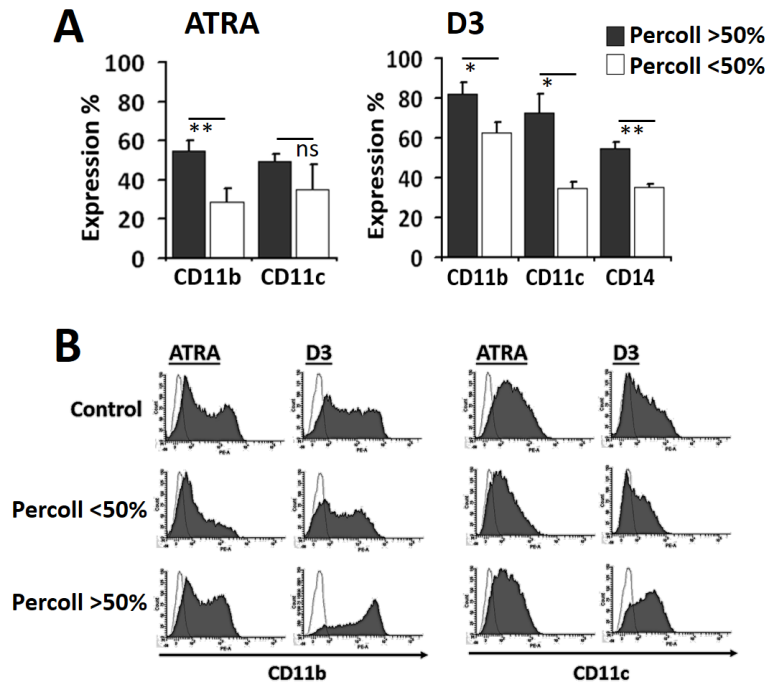

**Supplementary Figure 2. Confirmation of myeloid maturation with cell density.** Results obtained with HL-60 cell line are shown. **A)** Distribution of ATRA- or D3-treated cells carrying CD11b, CD11c, or CD14 over or below 50% Percoll fraction. **B)** Representative flow cytometry histograms for the cells expressing CD11b or CD11c are demonstrated (empty histogram, staining with isotype-matched control antibody; filled histogram, staining with specific antibody). (\* $P < 0.05$ , \*\* $P < 0.01$ ;  $n = 6$ ; ns, not significant).

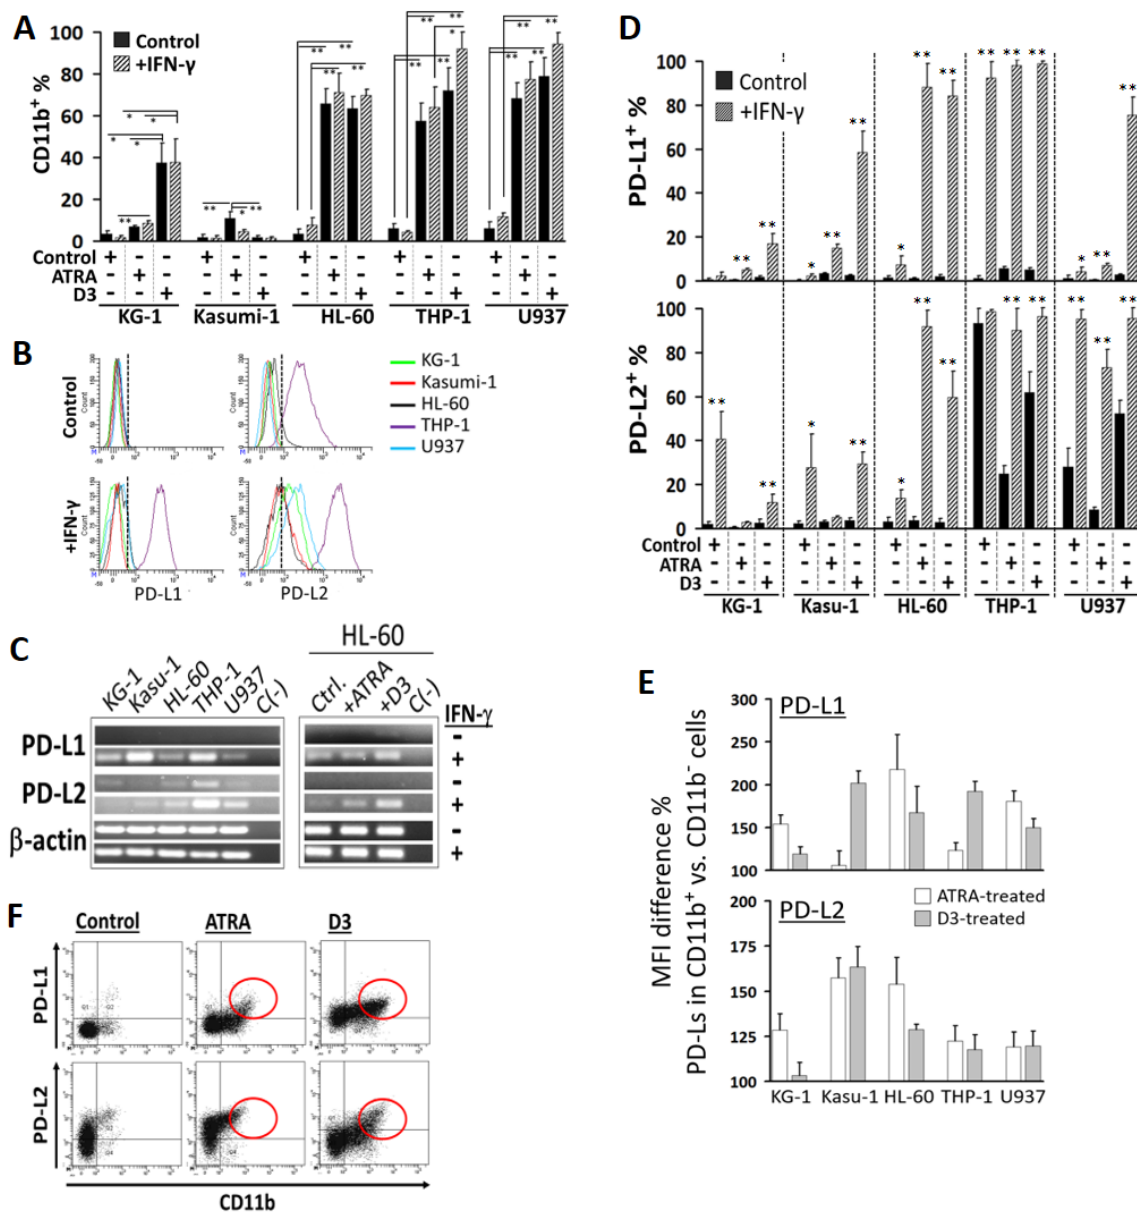

**Supplementary Figure 3. CD11b and PD-1 ligands' in myeloid leukemia cells under the influence of ATRA- or D3-induced maturation. A)** The cell lines, which are aligned in the x-axis according to their maturation characteristics according to FAB classification, were incubated with ATRA or D3 for 96h and/or with IFN- $\gamma$  for 48h. The percentage of CD11b<sup>+</sup> cells was determined by flow cytometry. **B)** Representative overlay histograms for basal level and IFN- $\gamma$ -induced expression of PD-L1 and PD-L2 on myeloid leukemia cells with different FAB classification/maturation properties. **C)** Induction of PD-1 ligand gene expression in myeloid leukemia cell lines in response to IFN- $\gamma$  (32h). The right-panel shows the results from HL-60 cells that were treated with ATRA or D3. B-actin is used as house-keeping gene. Representative agarose gel electrophoresis results from conventional PCR are shown. (Ctrl., control; C(-), dH<sub>2</sub>O negative control). **D)** Myeloid cell lines were pretreated with ATRA or D3 as an internal control for myeloid maturation that increase the frequency of CD11b positive cells. Following the incubation with IFN- $\gamma$ , the percentage of PD-L1- or PD-L2-positive cells were plotted. **E)** Difference in the levels of IFN- $\gamma$ -induced PD-1 ligands on CD11b<sup>+</sup> subpopulation was calculated in comparison to CD11b<sup>-</sup> cells which were pretreated with ATRA or D3. **F)** Co-expression of CD11b and PD-L1 or PD-L2 on the ATRA- or D3- treated HL-60 cells that were stimulated with IFN- $\gamma$  for 48h. Red

ellipses indicate the PD-L1 or PD-L2 positivity of the population with high CD11b expression. (\* $P < 0.05$ , \*\* $P < 0.01$ ; for cell lines,  $n \geq 3$ ; patient samples,  $n = 30$ ; MFI, median fluorescence intensity).

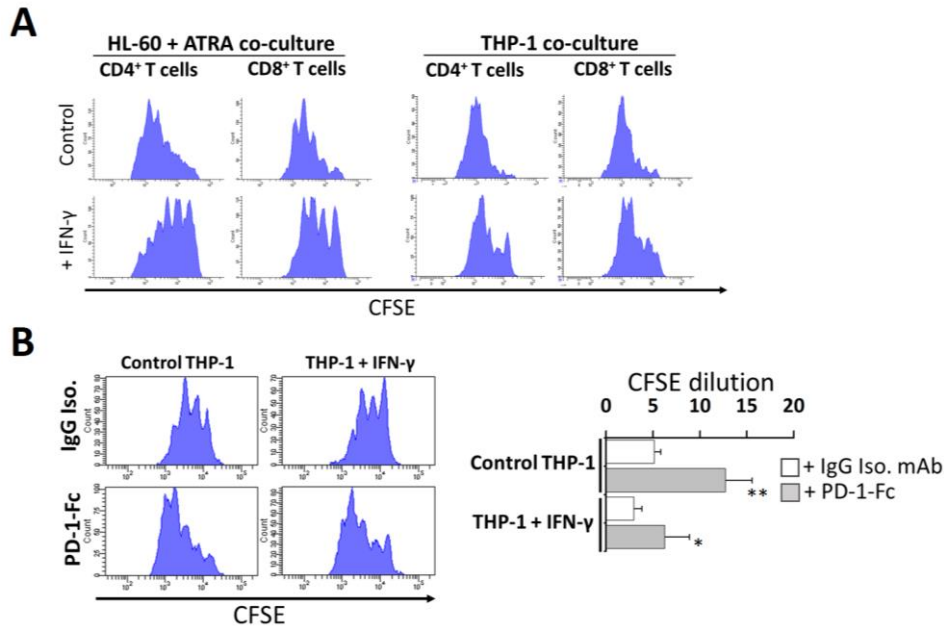

**Supplementary Figure 4. T cell proliferation in the presence of IFN- $\gamma$ -induced myeloid leukemia cells.** Freshly isolated CD4<sup>+</sup> or CD8<sup>+</sup> T cells were labelled with CFSE, stimulated with anti-CD3 mAb and co-cultured with ATRA-treated HL-60 or THP-1 cell lines (myeloid cell:T cell co-culture ratio 0.125:1 or 0.5:1) that were previously induced with IFN- $\gamma$ . **A**) Representative flow cytometry histograms for CFSE fluorescence out of three independent experiments are given. **B**) The CFSE-based proliferation assays were performed in the presence of isotype-matched control IgG (IgG Iso.) or PD-1-Fc protein that blocks PD-1 ligands. Left panel shows representative results from T cells co-cultured with THP-1 or IFN- $\gamma$ -induced THP-1 cells. Quantification of T cell proliferation as CFSE dilution is given in the right panel. (\* $P < 0.05$ , \*\* $P < 0.01$ ;  $n = 3$ ).

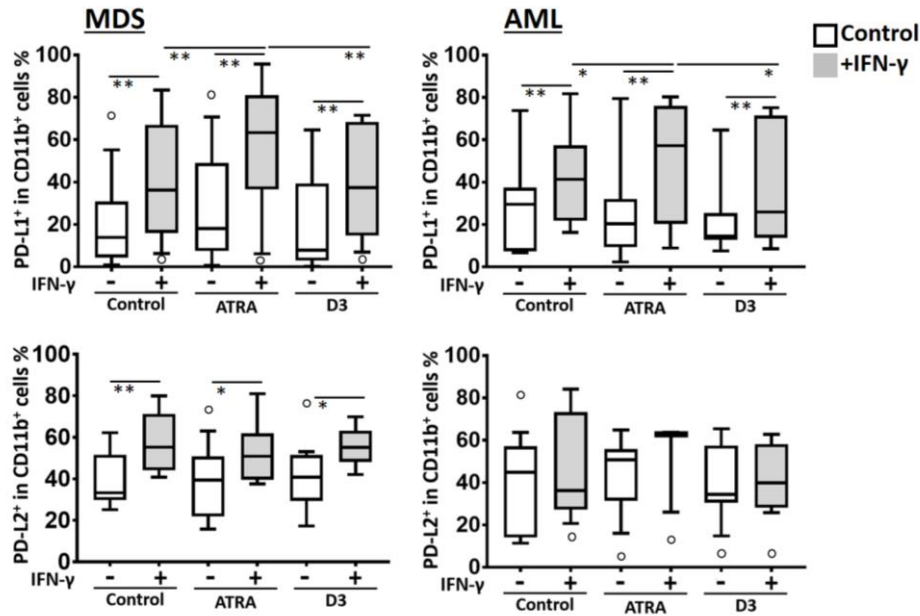

**Supplementary Figure 5. The effect of ATRA or D3 treatment on PD-1 ligand expression in patient samples.** The myeloid blasts from MDS (left panels;  $n=16$ ) and AML (right panels;  $n=10$ ) patients' bone marrow aspirates were pretreated with ATRA or D3 (96h); then, the percentage of IFN- $\gamma$ -induced PD-L1 (upper panels) or PD-L2 (lower panels) expression (48h) on the CD11b $^+$  population was determined. Outliers are shown as empty circles. (\* $P<0.05$ , \*\* $P<0.01$ ).

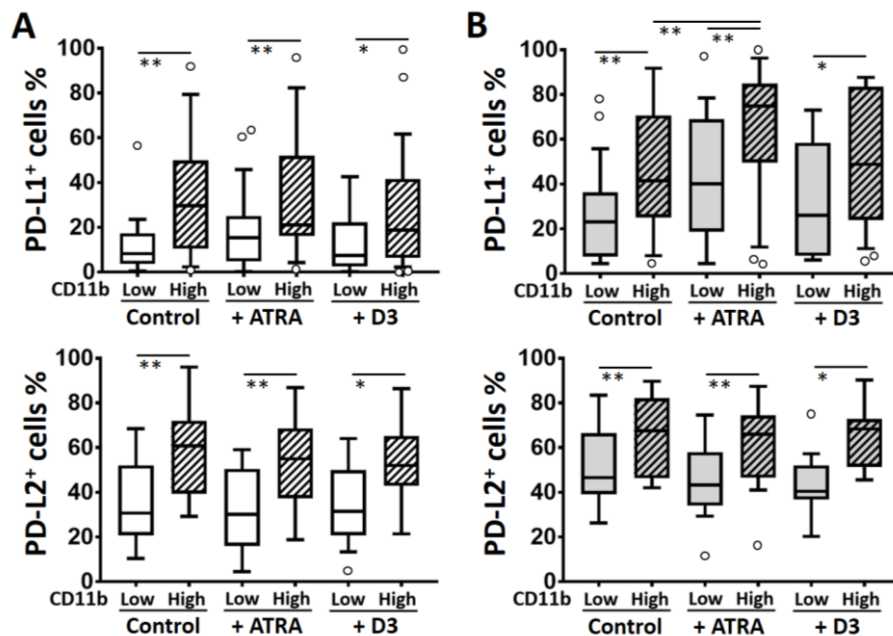

**Supplementary Figure 6. High-level CD11b on the MDS and AML patient-derived myeloid blasts is an indicator of increased capacity for PD-1 ligand expression.** Bone marrow aspirates from the patients were stimulated with ATRA or D3 and/or IFN- $\gamma$ . Then, CD11b $^+$  MDS and AML cells were gated into two subpopulations according to low and high CD11b fluorescence intensity and the percentage of cells carrying PD-L1 and PD-L2 was analyzed by flow cytometry. Box plots show the results from (A) unstimulated and (B) IFN- $\gamma$ -stimulated patients samples. (\* $P<0.05$ , \*\* $P<0.01$ ; patient samples,  $n=30$ ).

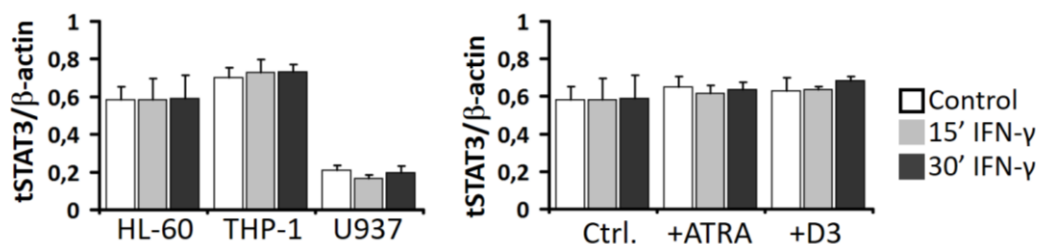

**Supplementary Figure 7.** Total STAT3 protein levels were not significantly changed upon stimulation with IFN- $\gamma$  for 15 or 30 minutes. Bar graphs display the semi-quantitative data from Western-Blot analysis calculated by normalizing the band intensities of total STAT3 to  $\beta$ -actin. Right panel show the results from HL-60 cells that were matured with ATRA or D3 for 96h. ( $n=3$ ).

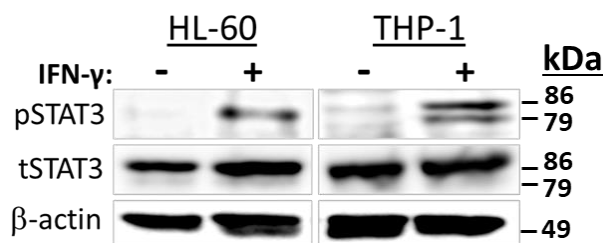

**Supplementary Figure 8.** Induction of pSTAT3 by IFN- $\gamma$  in myeloid leukemia cells in the presence of monensin, a secretory protein transport inhibitor, in order to exclude the influence of paracrine or autocrine factors influence on STAT3 induction. HL-60 and THP-1 cells were pretreated with monensin for 4h and followed by 48h incubation with IFN- $\gamma$  in the presence of monensin. Total STAT3 and Tyr705 phosphorylated pSTAT3 levels of were evaluated by Western-Blot.

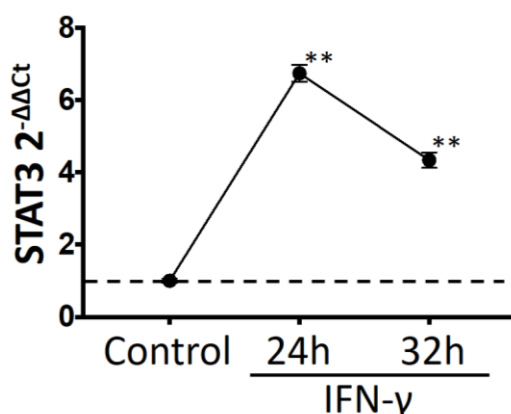

**Supplementary Figure 9.** STAT3 mRNA levels upon long-term IFN- $\gamma$  induction of CD11b<sup>+</sup> cells from healthy donors' peripheral blood. The change in STAT3 mRNA levels at 24 and 32h was determined by real-time RT-PCR. The dashed line crossing at  $2^{-\Delta\Delta Ct}=1$  indicates equal expression level with control (0h) cells. (\*\* $P<0.01$ ,  $n=3$ ).

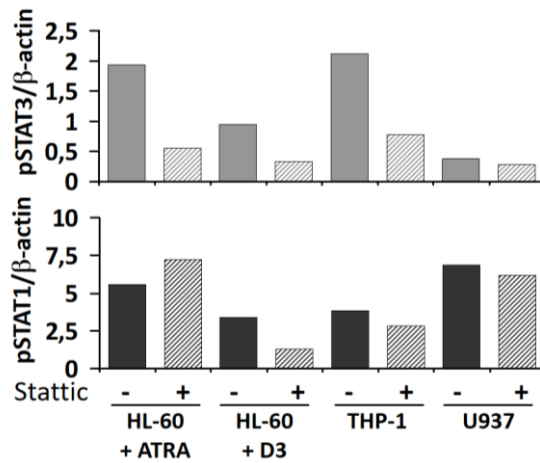

**Supplementary Figure 10.** The change in pSTAT3 (Tyr705) and pSTAT1 (Tyr701) levels in IFN- $\gamma$ -stimulated (15 min.) myeloid cells that were pretreated with static. Bar graphs display the semi-quantitative data from Western-Blot analysis calculated by normalizing the band intensities of pSTAT3 or pSTAT1 to  $\beta$ -actin. In order to induce myeloid maturation HL-60 cells were treated with ATRA or D3 for 96h. ( $n=3$ ).

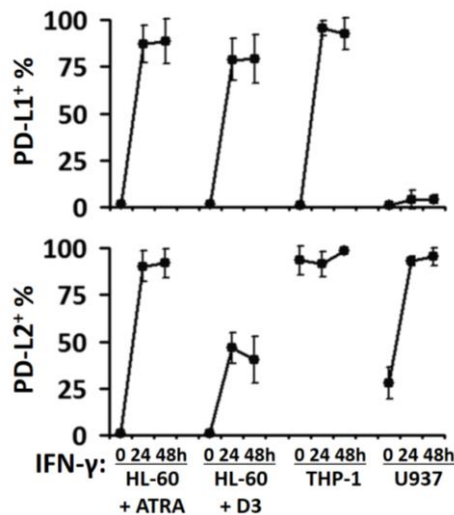

**Supplementary Figure 11.** The change in myeloid cells positivity for PD-L1 and PD-L2 in response to IFN- $\gamma$  treatment for 24h or 48h were studied by flow cytometry. In order to induce myeloid maturation HL-60 cells were treated with ATRA or D3 for 96h. ( $n=3$ ).



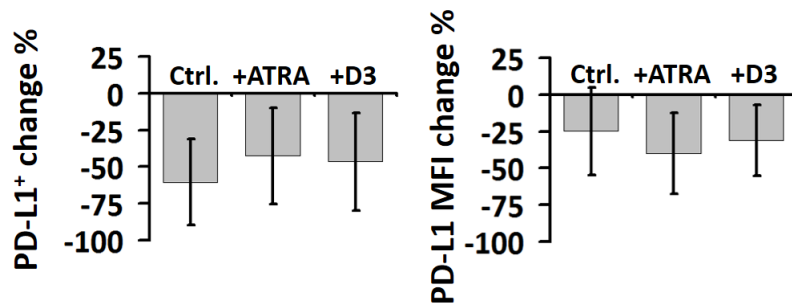

**Supplementary Figure 12. Pretreatment with static downregulates IFN- $\gamma$ -induced PD-L1 expression in patient derived CD11b<sup>+</sup> myeloid blasts.** Bone marrow aspirates from the control, ATRA- or D3-treated AML or MDS patients were pretreated with static (45 min) and then, stimulated with IFN- $\gamma$  for 24h. The expression of PD-L1 was evaluated on myeloid blasts gated on CD11b. The change in the percentage of PD-L1<sup>+</sup> cells (left panel) and PD-L1 surface levels (right panel) were calculated. For each individual, the data from the static-treated cells were normalized to those from controls that were not treated with static. ( $n=7$ ; MFI, median fluorescence intensity).

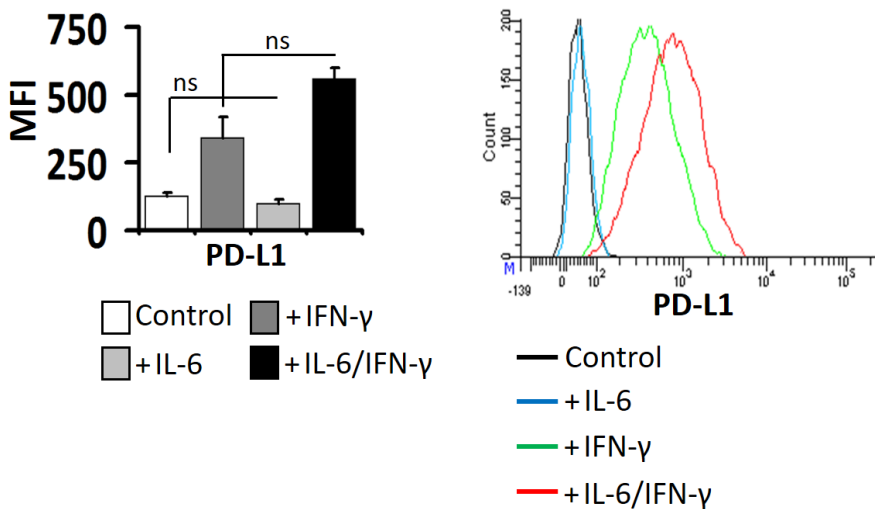

**Supplementary Figure 13. IL-6 as a common cytokine inducing STAT3 pathway did not increase PD-L1 expression.** THP-1 cells were incubated with recombinant IL-6, IFN- $\gamma$  or combination of both cytokines for 24h and the levels of PD-L1 were assayed by flow cytometry. Median fluorescence intensity (MFI) bar graphs and flow cytometry overlay histograms are demonstrated. ( $n=3$ ; ns, not significant).
